# Supplementary material for: Validation and Reliability of the Dyslexia Adult Checklist in Screening for Dyslexia
Source: PubMed Central journal article supplement — Dyslexia. 2024 Dec 11;31(1):e1797. doi: 10.1002/dys.1797 (PMC11632572; doi:10.1002/dys.1797), 2024-12-11
Supplement: DYS-31-e1797-s001.pdf [file DYS-31-e1797-s001.pdf]

## **Data Integrity**

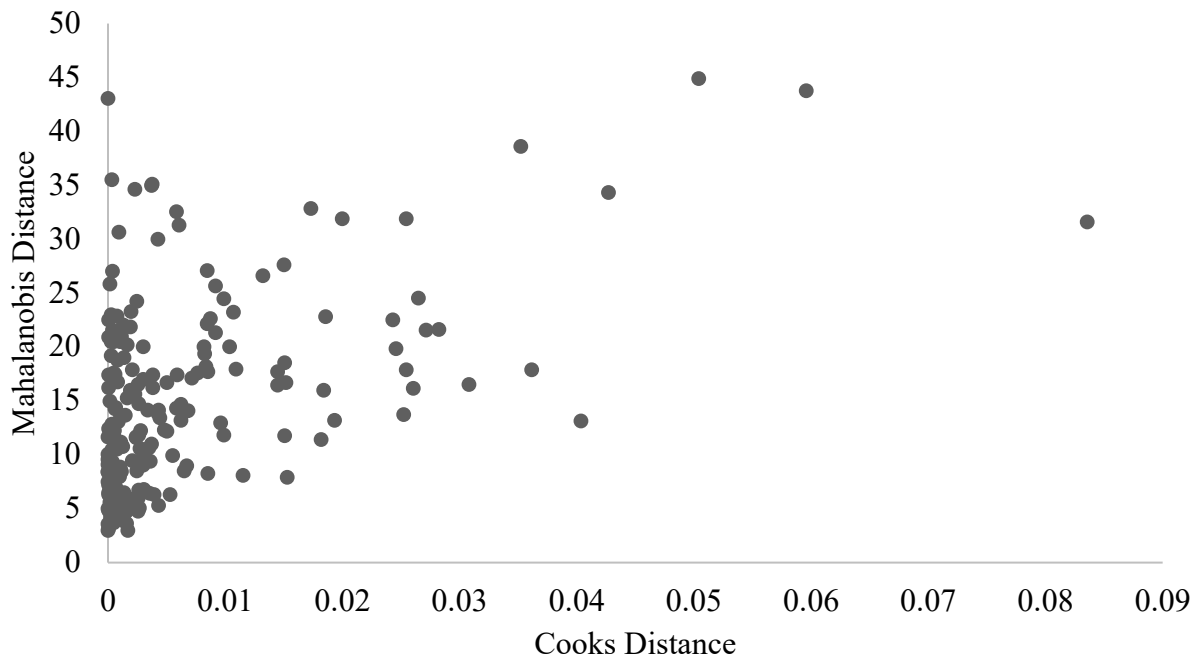

Figure A. Sample 1 scatterplot used to visually inspect for multivariate outliers, using the Cook's Distance (x-axis) and the Mahalanobis Distance (y-axis).

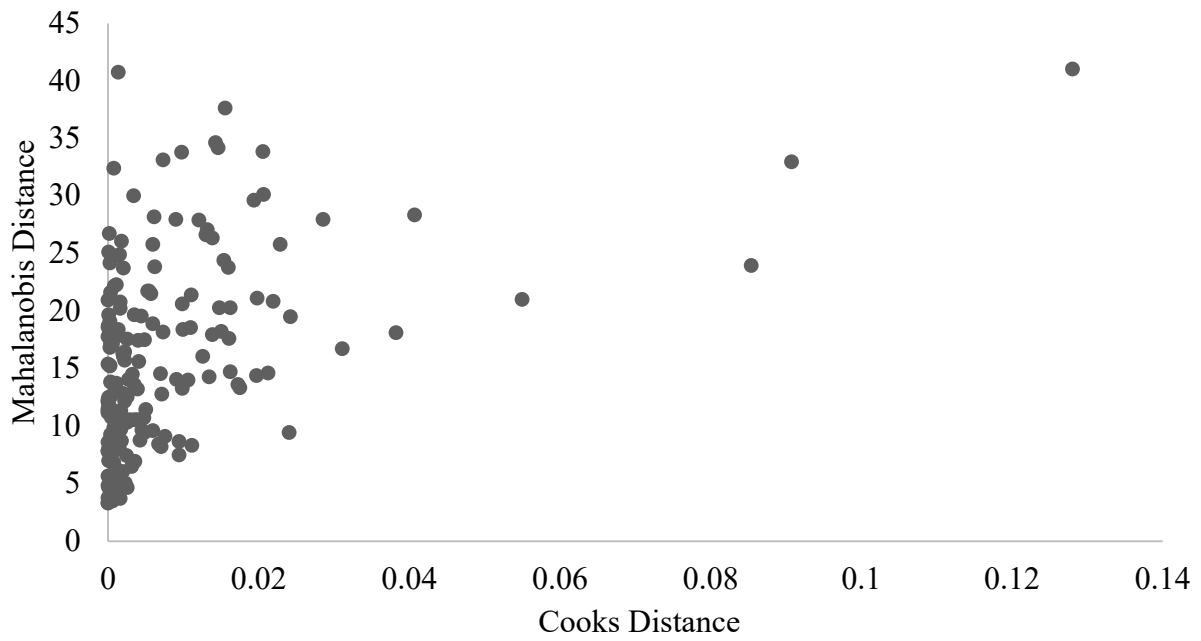

*Figure B.* Sample 2 scatterplot used to visually inspect for multivariate outliers, using the Cook's Distance (x-axis) and the Mahalanobis Distance (y-axis).

**Table A. Pearson's Correlations Sample 1**

| Variable | <i>M</i> | <i>SD</i> | AC1      | AC2      | AC3      | AC4      | AC5      | AC6      | AC7      | AC8      | AC9      | AC10   | AC11     | AC12     | AC13     | AC14 | AC15 |
|----------|----------|-----------|----------|----------|----------|----------|----------|----------|----------|----------|----------|--------|----------|----------|----------|------|------|
| 1. AC1   | 5.34     | 2.78      | —        |          |          |          |          |          |          |          |          |        |          |          |          |      |      |
| 2. AC2   | 4.85     | 1.84      | 0.545*** | —        |          |          |          |          |          |          |          |        |          |          |          |      |      |
| 3. AC3   | 1.39     | 0.71      | 0.47***  | 0.382*** | —        |          |          |          |          |          |          |        |          |          |          |      |      |
| 4. AC4   | 2.04     | 1.19      | 0.414*** | 0.469*** | 0.496*** | —        |          |          |          |          |          |        |          |          |          |      |      |
| 5. AC5   | 1.89     | 0.99      | 0.238*** | 0.208**  | 0.162*   | 0.205**  | —        |          |          |          |          |        |          |          |          |      |      |
| 6. AC6   | 2.88     | 0.87      | 0.506*** | 0.53***  | 0.302*** | 0.35***  | 0.214**  | —        |          |          |          |        |          |          |          |      |      |
| 7. AC7   | 2.41     | 0.97      | 0.498*** | 0.542*** | 0.309*** | 0.316*** | 0.226*** | 0.508*** | —        |          |          |        |          |          |          |      |      |
| 8. AC8   | 1.90     | 0.96      | 0.593*** | 0.556*** | 0.448*** | 0.426*** | 0.09     | 0.457*** | 0.565*** | —        |          |        |          |          |          |      |      |
| 9. AC9   | 2.21     | 0.96      | 0.471*** | 0.404*** | 0.41***  | 0.465*** | 0.178*   | 0.433*** | 0.481*** | 0.492*** | —        |        |          |          |          |      |      |
| 10. AC10 | 2.95     | 0.88      | 0.221**  | 0.277*** | 0.226*** | 0.122    | 0.034    | 0.17*    | 0.254*** | 0.209**  | 0.269*** | —      |          |          |          |      |      |
| 11. AC11 | 3.81     | 1.75      | 0.373*** | 0.283*** | 0.344*** | 0.376*** | 0.184**  | 0.281*** | 0.238*** | 0.344*** | 0.342*** | 0.145* | —        |          |          |      |      |
| 12. AC12 | 4.11     | 2.11      | 0.524*** | 0.502*** | 0.282*** | 0.327*** | 0.001    | 0.452*** | 0.508*** | 0.583*** | 0.507*** | 0.166* | 0.328*** | —        |          |      |      |
| 13. AC13 | 4.30     | 2.53      | 0.459*** | 0.53***  | 0.285*** | 0.411*** | 0.157*   | 0.446*** | 0.415*** | 0.495*** | 0.307*** | 0.161* | 0.322*** | 0.302*** | —        |      |      |
| 14. AC14 | 1.22     | 0.56      | 0.24***  | 0.238*** | 0.203**  | 0.357*** | 0.053    | 0.084    | 0.22**   | 0.311*** | 0.187**  | 0.115  | 0.263*** | 0.193**  | 0.31***  | —    |      |
| 15. AC15 | 1.97     | 1.07      | 0.506*** | 0.552*** | 0.408*** | 0.487*** | 0.059    | 0.369*** | 0.336*** | 0.531*** | 0.418*** | 0.116  | 0.312*** | 0.479*** | 0.415*** | 0.12 | —    |

\*  $p < .05$ , \*\*  $p < .01$ , \*\*\*  $p < .001$

**Table B. Sample 2 Pearson's Correlations**

| Variable | <i>M</i> | <i>SD</i> | AC1      | AC2      | AC3      | AC4      | AC5      | AC6      | AC7      | AC8      | AC9      | AC10  | AC11     | AC12     | AC13     | AC14     | AC15 |
|----------|----------|-----------|----------|----------|----------|----------|----------|----------|----------|----------|----------|-------|----------|----------|----------|----------|------|
| 1. AC1   | 5.52     | 2.95      | —        |          |          |          |          |          |          |          |          |       |          |          |          |          |      |
| 2. AC2   | 4.62     | 2.12      | 0.519*** | —        |          |          |          |          |          |          |          |       |          |          |          |          |      |
| 3. AC3   | 1.56     | 0.85      | 0.587*** | 0.443*** | —        |          |          |          |          |          |          |       |          |          |          |          |      |
| 4. AC4   | 2.01     | 1.13      | 0.343*** | 0.409*** | 0.314*** | —        |          |          |          |          |          |       |          |          |          |          |      |
| 5. AC5   | 2.13     | 1.06      | 0.394*** | 0.23**   | 0.286*** | 0.326*** | —        |          |          |          |          |       |          |          |          |          |      |
| 6. AC6   | 2.88     | 0.92      | 0.468*** | 0.567*** | 0.259*** | 0.392*** | 0.359*** | —        |          |          |          |       |          |          |          |          |      |
| 7. AC7   | 2.45     | 1.02      | 0.48***  | 0.479*** | 0.42***  | 0.401*** | 0.348*** | 0.519*** | —        |          |          |       |          |          |          |          |      |
| 8. AC8   | 1.94     | 0.95      | 0.484*** | 0.373*** | 0.446*** | 0.331*** | 0.263*** | 0.364*** | 0.52***  | —        |          |       |          |          |          |          |      |
| 9. AC9   | 2.34     | 1.00      | 0.457*** | 0.417*** | 0.473*** | 0.321*** | 0.364*** | 0.467*** | 0.587*** | 0.445*** | —        |       |          |          |          |          |      |
| 10. AC10 | 2.79     | 0.88      | 0.177*   | 0.179*   | 0.167*   | 0.118    | -0.036   | 0.114    | 0.084    | 0.143*   | 0.036    | —     |          |          |          |          |      |
| 11. AC11 | 4.43     | 2.57      | 0.44***  | 0.33***  | 0.378*** | 0.29***  | 0.323*** | 0.328*** | 0.305*** | 0.492*** | 0.356*** | 0.101 | —        |          |          |          |      |
| 12. AC12 | 4.23     | 2.02      | 0.512*** | 0.536*** | 0.447*** | 0.35***  | 0.378*** | 0.467*** | 0.501*** | 0.486*** | 0.534*** | 0.107 | 0.402*** | —        |          |          |      |
| 13. AC13 | 4.20     | 2.42      | 0.332*** | 0.385*** | 0.372*** | 0.263*** | 0.29***  | 0.293*** | 0.457*** | 0.405*** | 0.392*** | 0.049 | 0.323*** | 0.358*** | —        |          |      |
| 14. AC14 | 1.33     | 0.71      | 0.366*** | 0.253*** | 0.489*** | 0.289*** | 0.288*** | 0.19**   | 0.331*** | 0.409*** | 0.268*** | 0.014 | 0.415*** | 0.348*** | 0.344*** | —        |      |
| 15. AC15 | 1.89     | 1.09      | 0.502*** | 0.506*** | 0.443*** | 0.453*** | 0.336*** | 0.442*** | 0.434*** | 0.482*** | 0.46***  | 0.086 | 0.462*** | 0.479*** | 0.418*** | 0.419*** | —    |

\*  $p < .05$ , \*\*  $p < .01$ , \*\*\*  $p < .001$

## **EFA Results – Graphs and Tables**

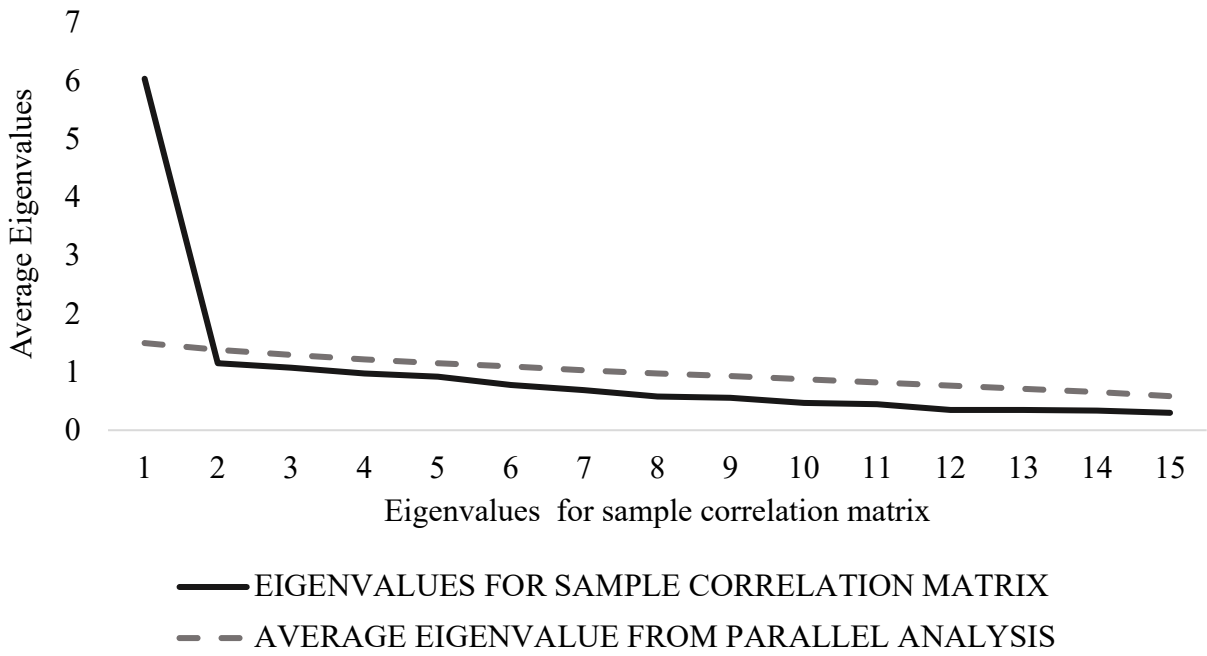

Figure C. Graphical depiction of Parallel Analysis for EFA using MLR

**Table C.** *Measurement Model's degrees of freedom (df), chi-square, comparative fit index (CFI)*

| Model   | df | $\chi^2$ | CFI  | TLI  | RMSEA |
|---------|----|----------|------|------|-------|
| Model 1 | 90 | 159.636  | .92  | .906 | .062  |
| Model 2 | 76 | 121.466  | .948 | .928 | .055  |



## **CFA Results – Tables**

**Table F.** Factor loadings and Uniquenesses for Two-Factor ESEM

| Items    | Standardized | Uniquenesses |
|----------|--------------|--------------|
| Factor 1 |              |              |
| AC3      | 0.678*       | 0.469        |
| AC4      | 0.16         | 0.706        |
| AC5      | 0.218        | 0.758        |
| AC9      | 0.235        | 0.533        |
| AC11     | 0.501*       | 0.629        |
| AC14     | 0.728*       | 0.56         |
| AC15     | 0.395*       | 0.503        |
| Factor 2 |              |              |
| AC1      | 0.399*       | 0.469        |
| AC2      | 0.678*       | 0.481        |
| AC6      | 0.926*       | 0.359        |
| AC7      | 0.586*       | 0.483        |
| AC8      | 0.247*       | 0.527        |
| AC10     | 0.122        | 0.974        |
| AC12     | 0.505*       | 0.492        |
| AC13     | 0.246*       | 0.688        |

Note: \*  $p > .05$

**Table G. Manual scoring and Factor Scores per Participant**

| Participant ID | Manual Scoring | Factor Score |
|----------------|----------------|--------------|
| 57             | 22             | -1.5         |
| 73             | 24             | -1.466       |
| 87             | 24             | -1.38        |
| 30             | 25             | -1.265       |
| 38             | 25             | -1.303       |
| 53             | 25             | -1.364       |
| 62             | 25             | -1.364       |
| 92             | 25             | -1.352       |
| 34             | 26             | -1.141       |
| 84             | 26             | -1.309       |
| 91             | 26             | -1.347       |
| 97             | 26             | -1.261       |
| 8              | 27             | -1.222       |
| 18             | 27             | -1.124       |
| 20             | 27             | -1.064       |
| 22             | 27             | -1.258       |
| 59             | 27             | -1.246       |
| 61             | 27             | -1.189       |
| 66             | 27             | -1.025       |
| 80             | 27             | -1.124       |
| 12             | 28             | -1.348       |
| 28             | 28             | -1.133       |
| 41             | 28             | -0.97        |
| 54             | 28             | -1.109       |
| 71             | 28             | -1.202       |
| 77             | 28             | -0.998       |
| 15             | 29             | -1.084       |
| 32             | 29             | -1.126       |
| 33             | 29             | -1.027       |
| 25             | 30             | -1.053       |
| 56             | 30             | -1.035       |
| 70             | 30             | -0.853       |
| 11             | 31             | -0.812       |
| 21             | 31             | -0.805       |
| 24             | 31             | -0.873       |
| 29             | 31             | -0.957       |

|     |    |        |
|-----|----|--------|
| 42  | 31 | -0.738 |
| 47  | 31 | -0.958 |
| 63  | 31 | -0.92  |
| 64  | 31 | -0.888 |
| 75  | 31 | -0.782 |
| 100 | 31 | -1.099 |
| 3   | 32 | -0.89  |
| 6   | 32 | -0.888 |
| 9   | 32 | -0.847 |
| 14  | 32 | -0.855 |
| 26  | 32 | -0.773 |
| 4   | 33 | -0.908 |
| 51  | 33 | -0.759 |
| 55  | 33 | -0.675 |
| 65  | 33 | -0.769 |
| 72  | 33 | -0.562 |
| 74  | 33 | -0.601 |
| 88  | 33 | -1.071 |
| 90  | 33 | -0.889 |
| 188 | 33 | -0.741 |
| 13  | 34 | -0.64  |
| 37  | 34 | -0.517 |
| 40  | 34 | -0.572 |
| 44  | 34 | -0.658 |
| 58  | 34 | -0.713 |
| 94  | 34 | -0.789 |
| 95  | 34 | -0.621 |
| 19  | 35 | -0.751 |
| 49  | 35 | -0.521 |
| 68  | 35 | -0.668 |
| 191 | 35 | -0.618 |
| 23  | 36 | -0.867 |
| 45  | 36 | -0.545 |
| 52  | 36 | -0.628 |
| 93  | 36 | -0.693 |
| 96  | 36 | -0.466 |
| 99  | 36 | -0.69  |
| 35  | 37 | -0.316 |
| 48  | 37 | -0.582 |
| 85  | 37 | -0.507 |

|     |    |        |
|-----|----|--------|
| 107 | 37 | -0.624 |
| 125 | 37 | -0.411 |
| 134 | 37 | -0.361 |
| 158 | 37 | -0.375 |
| 17  | 38 | -0.106 |
| 27  | 38 | -0.335 |
| 46  | 38 | -0.196 |
| 76  | 38 | -0.302 |
| 79  | 38 | -0.303 |
| 43  | 39 | -0.578 |
| 50  | 39 | -0.289 |
| 132 | 39 | -0.452 |
| 133 | 39 | -0.434 |
| 150 | 39 | -0.289 |
| 39  | 40 | -0.1   |
| 81  | 40 | -0.042 |
| 89  | 40 | -0.317 |
| 189 | 40 | -0.206 |
| 194 | 40 | -0.046 |
| 198 | 40 | -0.288 |
| 78  | 41 | -0.171 |
| 7   | 42 | -0.047 |
| 69  | 42 | -0.127 |
| 82  | 42 | -0.178 |
| 83  | 42 | -0.191 |
| 86  | 42 | 0.015  |
| 120 | 42 | -0.227 |
| 156 | 42 | -0.167 |
| 159 | 42 | -0.188 |
| 174 | 42 | 0.058  |
| 10  | 43 | -0.219 |
| 177 | 43 | -0.152 |
| 193 | 43 | -0.088 |
| 108 | 44 | 0.187  |
| 141 | 44 | -0.146 |
| 176 | 44 | -0.11  |
| 178 | 44 | 0.015  |
| 16  | 45 | 0.347  |
| 131 | 45 | 0.215  |
| 167 | 45 | 0.133  |

|     |    |        |
|-----|----|--------|
| 172 | 45 | 0.215  |
| 31  | 46 | 0.087  |
| 138 | 46 | 0.058  |
| 5   | 47 | 0.348  |
| 98  | 47 | 0.28   |
| 105 | 47 | 0.147  |
| 109 | 47 | 0.336  |
| 115 | 47 | 0.066  |
| 124 | 47 | 0.402  |
| 130 | 47 | 0.285  |
| 154 | 47 | 0.067  |
| 186 | 47 | -0.021 |
| 102 | 48 | -0.212 |
| 143 | 48 | 0.043  |
| 175 | 48 | 0.319  |
| 187 | 48 | 0.368  |
| 67  | 49 | 0.608  |
| 126 | 49 | 0.209  |
| 145 | 49 | 0.201  |
| 163 | 49 | 0.309  |
| 183 | 49 | 0.403  |
| 192 | 49 | 0.497  |
| 36  | 50 | 0.344  |
| 60  | 50 | 0.46   |
| 123 | 50 | 0.289  |
| 144 | 50 | 0.169  |
| 106 | 52 | 0.52   |
| 129 | 52 | 0.436  |
| 161 | 52 | 0.393  |
| 1   | 53 | 0.52   |
| 2   | 53 | 0.824  |
| 155 | 53 | 0.798  |
| 173 | 53 | 0.608  |
| 112 | 54 | 0.616  |
| 116 | 54 | 0.993  |
| 119 | 54 | 0.749  |
| 185 | 55 | 0.689  |
| 128 | 56 | 1.097  |
| 136 | 56 | 0.602  |
| 103 | 57 | 0.977  |

|     |    |       |
|-----|----|-------|
| 104 | 57 | 0.667 |
| 127 | 57 | 0.554 |
| 111 | 59 | 1.129 |
| 117 | 59 | 0.439 |
| 135 | 60 | 0.863 |
| 162 | 60 | 0.895 |
| 184 | 60 | 1.076 |
| 157 | 61 | 1.139 |
| 180 | 61 | 1.099 |
| 190 | 61 | 1.289 |
| 195 | 61 | 1.281 |
| 197 | 61 | 1.167 |
| 166 | 62 | 1.217 |
| 181 | 62 | 1.188 |
| 196 | 62 | 1.195 |
| 199 | 62 | 1.038 |
| 139 | 63 | 1.325 |
| 114 | 64 | 1.131 |
| 148 | 64 | 1.244 |
| 151 | 64 | 1.531 |
| 113 | 65 | 1.32  |
| 149 | 66 | 1.185 |
| 152 | 66 | 1.581 |
| 101 | 67 | 1.473 |
| 153 | 67 | 1.841 |
| 169 | 67 | 1.451 |
| 179 | 67 | 1.656 |
| 110 | 68 | 1.12  |
| 164 | 69 | 1.685 |
| 165 | 70 | 1.732 |
| 182 | 70 | 1.908 |
| 171 | 72 | 1.613 |
| 118 | 73 | 1.62  |
| 137 | 73 | 2.025 |
| 140 | 73 | 1.526 |
| 142 | 73 | 1.806 |
| 147 | 74 | 1.798 |
| 121 | 75 | 1.955 |
| 122 | 76 | 2.201 |
| 146 | 76 | 2.076 |

|     |    |       |
|-----|----|-------|
| 160 | 76 | 2.251 |
| 170 | 76 | 1.968 |
| 168 | 78 | 2.395 |

---



**$R^2$  for a 1 Factor Solution**

| Observed | Two-Tailed |       |           |         |
|----------|------------|-------|-----------|---------|
| Variable | Estimate   | S.E.  | Est./S.E. | P-Value |
| AC1      | 0.526      | 0.054 | 9.777     | <0.001  |
| AC2      | 0.46       | 0.062 | 7.451     | <0.001  |
| AC3      | 0.429      | 0.061 | 7.051     | <0.001  |
| AC4      | 0.288      | 0.065 | 4.452     | <0.001  |
| AC5      | 0.243      | 0.059 | 4.105     | <0.001  |
| AC6      | 0.399      | 0.059 | 6.778     | <0.001  |
| AC7      | 0.503      | 0.05  | 10.002    | <0.001  |
| AC8      | 0.451      | 0.058 | 7.778     | <0.001  |
| AC9      | 0.467      | 0.058 | 8.009     | <0.001  |
| AC10     | 0.026      | 0.025 | 1.03      | 0.303   |
| AC11     | 0.333      | 0.061 | 5.488     | <0.001  |
| AC12     | 0.512      | 0.062 | 8.271     | <0.001  |
| AC13     | 0.308      | 0.065 | 4.729     | <0.001  |
| AC14     | 0.269      | 0.065 | 4.169     | <0.001  |
| AC15     | 0.497      | 0.063 | 7.844     | <0.001  |

**$R^2$  for a 2 Factor Solution**

| Observed | Two-Tailed |       |           |         |
|----------|------------|-------|-----------|---------|
| Variable | Estimate   | S.E.  | Est./S.E. | P-Value |
| AC1      | 0.531      | 0.055 | 9.664     | <0.001  |
| AC2      | 0.519      | 0.074 | 6.998     | <0.001  |
| AC3      | 0.531      | 0.097 | 5.474     | <0.001  |
| AC4      | 0.294      | 0.064 | 4.577     | <0.001  |
| AC5      | 0.242      | 0.058 | 4.149     | <0.001  |
| AC6      | 0.641      | 0.16  | 4.006     | <0.001  |
| AC7      | 0.517      | 0.056 | 9.191     | <0.001  |
| AC8      | 0.473      | 0.058 | 8.178     | <0.001  |
| AC9      | 0.467      | 0.063 | 7.374     | <0.001  |
| AC10     | 0.026      | 0.025 | 1.064     | 0.287   |
| AC11     | 0.371      | 0.089 | 4.162     | <0.001  |
| AC12     | 0.508      | 0.064 | 7.995     | <0.001  |
| AC13     | 0.312      | 0.067 | 4.63      | <0.001  |
| AC14     | 0.44       | 0.138 | 3.191     | 0.001   |
| AC15     | 0.497      | 0.064 | 7.781     | <0.001  |
